# Supplementary material
Source: PubMed Central journal article supplement (PMC1948896)

HC-030031

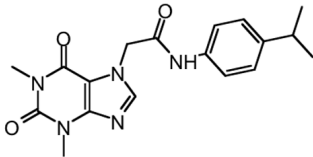

Acrolein

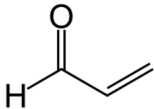

Formaldehyde

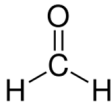

Supplement: pnas_0705924104_1.pdf [file pnas_0705924104_1.pdf]

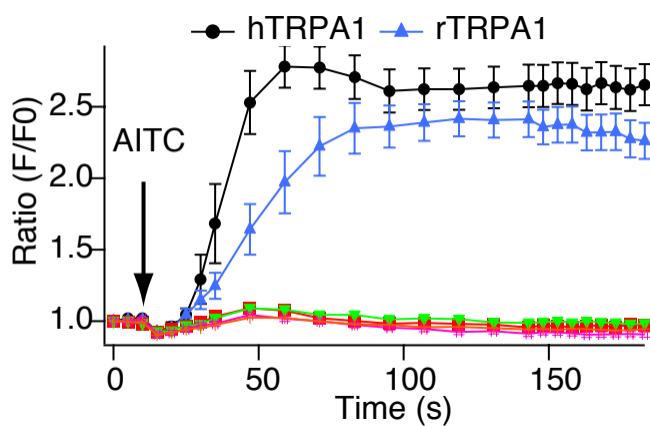

Supplement: pnas_0705924104_2.pdf [file pnas_0705924104_2.pdf]
